# Supplementary material for: Solvent-induced secondary building unit (SBU) variations in a series of Cu(ii) metal–organic frameworks derived from a bifunctional ligand
Source: Royal Society of Chemistry journal article supplement (doi:10.1039/c5dt00994d), 2015-01-01
Supplement: c5dt00994d1.pdf [file c5dt00994d1.pdf]

*Supporting Information for the Manuscript:*

**Solvent-induced Secondary Building Unit (SBU) Variations in a Series of  
Cu(II) Metal–Organic Frameworks Derived from a Bifunctional Ligand**

*Di-Ming Chen, Jian-Gong Ma\* and Peng Cheng*

Department of Chemistry, Key Laboratory of Advanced Energy Materials Chemistry (MOE), and  
Collaborative Innovation Center of Chemical Science and Engineering (Tianjin), Nankai  
University, Tianjin 300071, P. R. China

Author for correspondence: [mvbasten@nankai.edu.cn](mailto:mvbasten@nankai.edu.cn)

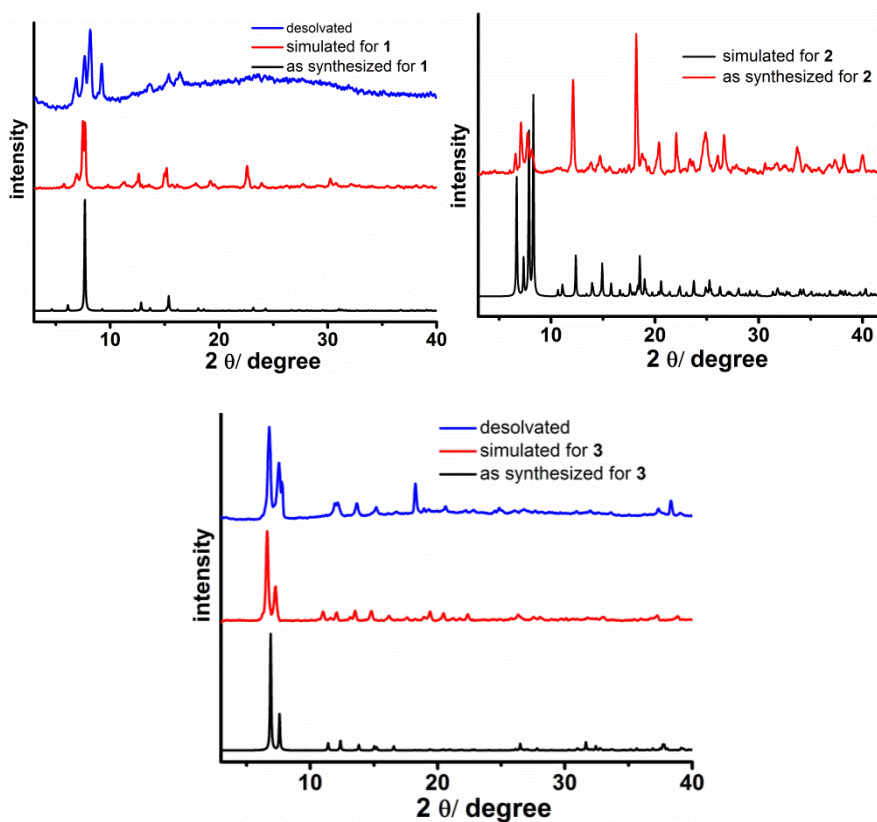

**Fig. S1.** Experimental (red) and simulated (black) PXRD patterns of complexes. 1–3.

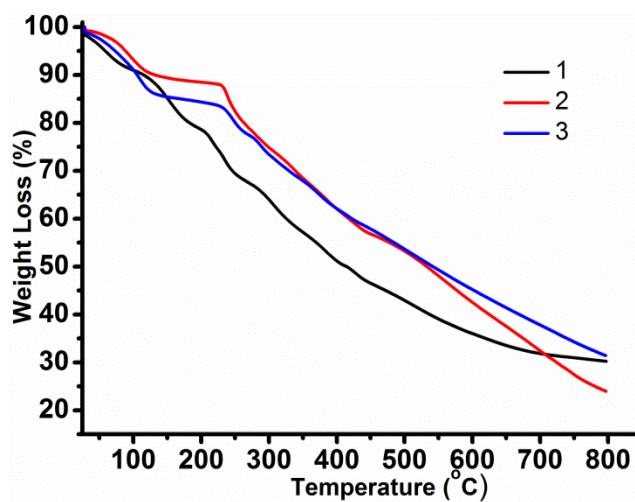

**Fig. S2.** Thermogravimetric curves of 1-3.

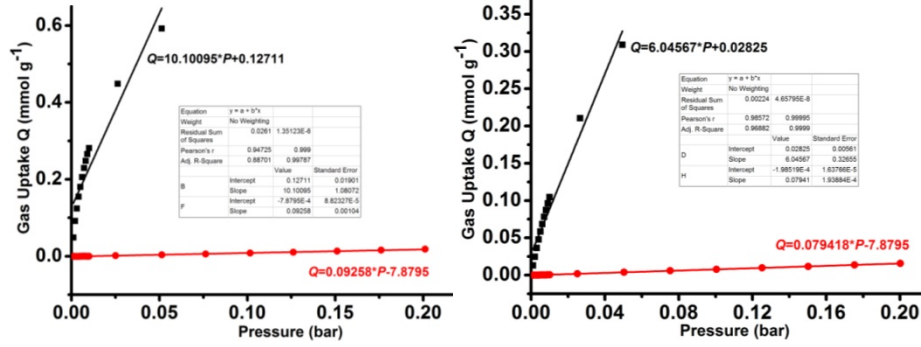

**Fig. S3** Linear fitting of the low-pressure region of CO<sub>2</sub> (black) and N<sub>2</sub> (red) adsorption isotherms of **3** measured at 273 and 298 K, respectively.

### Analysis of Gas Adsorption Isotherms:

The carbon dioxide adsorption isotherms of **3** are fitted to the Langmuir-Freundlich according to the literature.<sup>1</sup> An accurate fit was obtained by using this equation which results a precise prediction over the quantity of gas adsorbed at saturation. A variant of the Clausius-Clapeyron equation was used to calculate enthalpy of adsorption.

$$\ln \frac{P_1}{P_2} = \Delta H_{ads} \times \frac{T_2 - T_1}{R \times T_2 \times T_1} \quad (\text{I})$$

where  $T_1$  and  $T_2$  are the two isotherm temperatures (273 and 298 K),  $P_1$  and  $P_2$  are pressures at  $T_1$  and  $T_2$ , respectively, for a given uptake, and  $R$  is the universal gas constant ( $R = 8.3147 \text{ J} / (\text{K} \cdot \text{mol})$ ). Pressure as a function of the amount of gas adsorbed was determined using the Langmuir-Freundlich fit for the isotherms.

$$\frac{q_i}{q} = \frac{bp^{(1/t)}}{1 + bp^{(1/t)}} \quad (\text{II})$$

Where  $q_i$  = the amount adsorbed,  $q$  = the amount adsorbed at saturation,  $p$  = pressure,

$$p = \left( \frac{q_i}{q} \right)^t \left( \frac{b - b \frac{q_i}{q}}{q} \right) \quad (III)$$

b and t = constants. The equation (II) rearranges to:

$$\Delta H_{ads} = \frac{RT_1 T_2}{T_2 - T_1} \times \ln \left( \frac{P_1}{P_2} \right) \quad (IV)$$

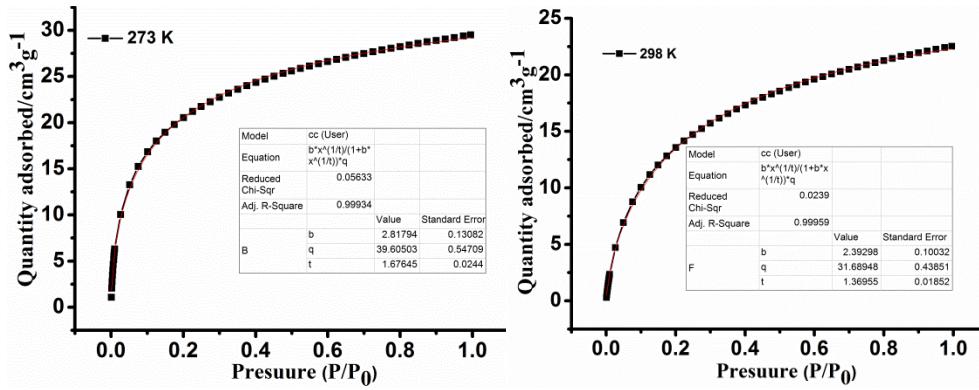

**Fig. S4.** CO<sub>2</sub> adsorption isotherm for **3** at 273 K and 298 K. The red solid line represents the best fit to the data using the Langmuir-Freundlich equation, as described above.

#### IAST Adsorption Selectivity Calculation

The ideal adsorbed solution theory (IAST) was adopted based upon the experimental single gas adsorption measurements as described in the main text, including carbon dioxide and nitrogen at 273 K and 298 K, which is commonly used to predict binary mixture adsorption selectivity. Using the pure component isotherm fits, the adsorption selectivity is defined by:

$$S_{ads} = (q_1/q_2)/(p_1/p_2),$$

Where  $q_i$  is the amount of  $i$  adsorbed and  $p_i$  is the partial pressure of  $i$  in the mixture fits.

We use the following written codes to simulate the adsorption selectivity of CO<sub>2</sub> over

N<sub>2</sub>.

28

# No. of Pressure Point

0.2, 0.8

# Molar fraction of binary mixture (y1 and y2, y1 + y2 = 1)

100, 200, 300, 400, 500, 600, 700, 800, 900, 1000, 2000, 3000, 4000, 5000, 6000,

7000, 8000, 9000, 10000, 20000, 30000, 40000, 50000, 60000, 70000, 80000, 90000,

100000

#The unit is same parameter b, Pa

a1, a2

# fitting parameter Nsat for both component (Unit: mmol/g)

b1, b2

# fitting parameter b for both component (Unit: kPa-1)

### Selectivity Data of CO<sub>2</sub>:N<sub>2</sub> (15:85) at 298K

|            | A(X)     | B(Y)     | C(Y)    | D(Y)    | E(Y)    | F(Y)        |
|------------|----------|----------|---------|---------|---------|-------------|
| Long Name  | Pressure | N1       | N2      | x1      | x2      | Selectivity |
| Units      | Pa       | mmol/g   | mmol/g  |         |         |             |
| Comments   |          |          |         |         |         |             |
| Sparklines |          |          |         |         |         |             |
| 1          | 100      | 0.02985  | 0.00142 | 0.95459 | 0.04541 | 84.07596    |
| 2          | 200      | 0.05964  | 0.00284 | 0.95457 | 0.04543 | 84.045      |
| 3          | 300      | 0.08935  | 0.00425 | 0.95455 | 0.04545 | 84.01405    |
| 4          | 400      | 0.11898  | 0.00567 | 0.95454 | 0.04546 | 83.98336    |
| 5          | 500      | 0.14855  | 0.00708 | 0.95452 | 0.04548 | 83.95245    |
| 6          | 600      | 0.17805  | 0.00849 | 0.95451 | 0.0455  | 83.92157    |
| 7          | 700      | 0.20747  | 0.00989 | 0.95449 | 0.04551 | 83.89094    |
| 8          | 800      | 0.23683  | 0.0113  | 0.95447 | 0.04553 | 83.86033    |
| 9          | 900      | 0.26611  | 0.0127  | 0.95446 | 0.04554 | 83.82952    |
| 10         | 1000     | 0.29533  | 0.0141  | 0.95444 | 0.04556 | 83.79895    |
| 11         | 2000     | 0.58367  | 0.02796 | 0.95428 | 0.04572 | 83.49492    |
| 12         | 3000     | 0.86527  | 0.0416  | 0.95413 | 0.04587 | 83.19457    |
| 13         | 4000     | 1.14036  | 0.05502 | 0.95397 | 0.04603 | 82.89785    |
| 14         | 5000     | 1.40917  | 0.06824 | 0.95381 | 0.04619 | 82.60471    |
| 15         | 6000     | 1.67189  | 0.08124 | 0.95366 | 0.04634 | 82.31532    |
| 16         | 7000     | 1.92875  | 0.09405 | 0.9535  | 0.0465  | 82.02917    |
| 17         | 8000     | 2.17993  | 0.10667 | 0.95335 | 0.04665 | 81.74646    |
| 18         | 9000     | 2.42561  | 0.1191  | 0.9532  | 0.0468  | 81.46712    |
| 19         | 10000    | 2.66597  | 0.13134 | 0.95305 | 0.04695 | 81.1911     |
| 20         | 20000    | 4.8112   | 0.24486 | 0.95157 | 0.04843 | 78.594      |
| 21         | 30000    | 6.57389  | 0.34483 | 0.95016 | 0.04984 | 76.25754    |
| 22         | 40000    | 8.04737  | 0.43418 | 0.94881 | 0.05119 | 74.13814    |
| 23         | 50000    | 9.29693  | 0.51505 | 0.94751 | 0.05249 | 72.2018     |
| 24         | 60000    | 10.36962 | 0.589   | 0.94625 | 0.05375 | 70.4221     |
| 25         | 70000    | 11.30017 | 0.6572  | 0.94504 | 0.05496 | 68.77774    |
| 26         | 80000    | 12.1148  | 0.72057 | 0.94386 | 0.05614 | 67.25135    |
| 27         | 90000    | 12.83368 | 0.77982 | 0.94272 | 0.05728 | 65.82862    |
| 28         | 100000   | 13.47254 | 0.83554 | 0.9416  | 0.0584  | 64.49779    |

Table S1. Selected Bond Lengths (Å) and Bond Angles (°) for **1**

|                      |           |                      |            |
|----------------------|-----------|----------------------|------------|
| Cu(1)-N(3)#1         | 2.015(8)  | N(3)#1-Cu(1)-N(3)#2  | 90.4(5)    |
| Cu(1)-N(3)#2         | 2.015(8)  | N(3)#1-Cu(1)-N(3)#3  | 89.6(5)    |
| Cu(1)-N(3)#3         | 2.015(8)  | N(3)#2-Cu(1)-N(3)#3  | 180.0(4)   |
| Cu(1)-N(3)           | 2.015(8)  | N(3)#1-Cu(1)-N(3)    | 179.997(1) |
| Cu(1)-Cl(3)          | 2.642(4)  | N(3)#2-Cu(1)-N(3)    | 89.6(5)    |
| Cu(1)-Cl(3)#1        | 2.642(4)  | N(3)#3-Cu(1)-N(3)    | 90.4(5)    |
| Cu(2)-O(2)#4         | 1.946(13) | N(3)#1-Cu(1)-Cl(3)   | 89.4(2)    |
| Cu(2)-O(2)#5         | 1.946(13) | N(3)#2-Cu(1)-Cl(3)   | 90.6(2)    |
| Cu(2)-O(2)#6         | 1.946(13) | N(3)#3-Cu(1)-Cl(3)   | 89.4(2)    |
| Cu(2)-O(2)           | 1.946(13) | N(3)-Cu(1)-Cl(3)     | 90.6(2)    |
| Cu(2)-Cl(1)          | 2.216(5)  | N(3)#1-Cu(1)-Cl(3)#1 | 90.6(2)    |
| Cu(2)-Cu(2)#7        | 2.661(11) | N(3)#2-Cu(1)-Cl(3)#1 | 89.4(2)    |
| Cl(3)-Cu(1)#8        | 2.642(4)  | N(3)#3-Cu(1)-Cl(3)#1 | 90.6(2)    |
| Cl(3)-Cu(1)-Cl(3)#1  | 180.0     | O(2)#4-Cu(2)-O(2)#5  | 84.3(10)   |
| O(2)#4-Cu(2)-O(2)#6  | 94.4(10)  | O(2)#5-Cu(2)-O(2)#6  | 167.5(13)  |
| O(2)#4-Cu(2)-O(2)    | 167.5(13) | O(2)#5-Cu(2)-O(2)    | 94.4(10)   |
| O(2)#6-Cu(2)-O(2)    | 84.2(10)  | O(2)#4-Cu(2)-Cl(1)   | 96.2(7)    |
| O(2)#5-Cu(2)-Cl(1)   | 96.2(7)   | O(2)#6-Cu(2)-Cl(1)   | 96.2(7)    |
| O(2)-Cu(2)-Cl(1)     | 96.2(7)   | O(2)#4-Cu(2)-Cu(2)#7 | 83.8(7)    |
| O(2)#5-Cu(2)-Cu(2)#7 | 83.8(7)   | Cl(1)-Cu(2)-Cu(2)#7  | 180.0(13)  |
| O(2)#6-Cu(2)-Cu(2)#7 | 83.8(7)   | Cu(1)#8-Cl(3)-Cu(1)  | 84.29(1)   |
| O(2)-Cu(2)-Cu(2)#7   | 83.8(7)   |                      |            |

Symmetry transformations used to generate equivalent atoms: 1):  $-x+1/2, -y+1/2, -z+1$ ;

2)  $x, y, -z+1$ ; 3):  $-x+1/2, -y+1/2, z$ ; 4)  $x, -y, -z$ ; 5):  $x, y, -z$ ; 6):  $x, -y, z$ ; 7):  $-x, -y, -z$ ; 8):

$x+1/2, -y+1/2, -z+1$

Table S2. Selected Bond Lengths (Å) and Bond Angles (°) for **2**

|               |          |                     |           |
|---------------|----------|---------------------|-----------|
| Cu(1)-O(5)#1  | 1.953(6) | O(5)#1-Cu(1)-O(5)#2 | 91.9(4)   |
| Cu(1)-O(5)#2  | 1.953(6) | O(5)#1-Cu(1)-O(3)#3 | 167.9(2)  |
| Cu(1)-O(3)#3  | 1.972(6) | O(5)#2-Cu(1)-O(3)#3 | 88.2(3)   |
| Cu(1)-O(3)#4  | 1.972(6) | O(5)#1-Cu(1)-O(3)#4 | 88.2(3)   |
| Cu(1)-Cl(4)   | 2.390(3) | O(5)#2-Cu(1)-O(3)#4 | 167.9(2)  |
| Cu(1)-Cu(1)#5 | 2.640(2) | O(3)#3-Cu(1)-O(3)#4 | 89.2(4)   |
| Cu(2)-N(7)    | 1.963(6) | O(5)#1-Cu(1)-Cl(4)  | 92.17(18) |
| Cu(2)-N(7)#6  | 1.963(6) | O(5)#2-Cu(1)-Cl(4)  | 92.17(18) |
| Cu(2)-O(2)    | 2.032(7) | O(3)#3-Cu(1)-Cl(4)  | 99.87(18) |

|                      |            |                      |           |
|----------------------|------------|----------------------|-----------|
| Cu(2)-Cl(4)          | 2.280(3)   | O(3)#4-Cu(1)-Cl(4)   | 99.87(18) |
| Cu(2)-O(1)           | 2.481(11)  | O(5)#1-Cu(1)-Cu(1)#5 | 80.02(17) |
| Cu(2)-Cl(1)          | 2.5943(14) | O(5)#2-Cu(1)-Cu(1)#5 | 80.02(17) |
| Cu(3)-N(9)           | 1.948(7)   | O(3)#3-Cu(1)-Cu(1)#5 | 88.13(17) |
| Cu(3)-N(3)           | 1.960(7)   | O(3)#4-Cu(1)-Cu(1)#5 | 88.13(17) |
| Cu(3)-O(2)           | 2.028(4)   | Cl(4)-Cu(1)-Cu(1)#5  |           |
| Cu(3)-Cl(2)          | 2.276(3)   | 168.70(11)           |           |
| Cu(3)-O(0AA)#7       | 2.450(16)  | N(7)-Cu(2)-N(7)#6    | 173.9(4)  |
| O(2)-Cu(3)#          | 62.027(4)  | N(7)-Cu(2)-O(2)      | 89.51(18) |
| N(9)-Cu(3)-Cl(2)     | 91.3(2)    | N(7)#6-Cu(2)-O(2)    | 89.51(18) |
| N(3)-Cu(3)-Cl(2)     | 91.4(2)    | N(7)-Cu(2)-Cl(4)     | 91.06(18) |
| O(2)-Cu(3)-Cl(2)     | 172.8(2)   | N(7)#6-Cu(2)-Cl(4)   | 91.06(18) |
| N(9)-Cu(3)-O(0AA)#7  | 86.9(5)    | O(2)-Cu(2)-Cl(4)     | 168.7(3)  |
| N(3)-Cu(3)-O(0AA)#7  | 90.6(5)    | N(7)-Cu(2)-O(1)      | 87.0(2)   |
| O(2)-Cu(3)-O(0AA)#7  | 98.4(5)    | N(7)#6-Cu(2)-O(1)    | 87.0(2)   |
| Cl(2)-Cu(3)-O(0AA)#7 | 88.8(5)    | O(2)-Cu(2)-O(1)      | 94.0(3)   |
| Cu(2)-Cl(4)-Cu(1)    | 120.53(12) | Cl(4)-Cu(2)-O(1)     | 97.3(3)   |
| Cu(3)#6-O(2)-Cu(3)   | 112.9(4)   | N(7)-Cu(2)-Cl(1)     | 92.8(2)   |
| Cu(3)#6-O(2)-Cu(2)   | 109.3(2)   | N(7)#6-Cu(2)-Cl(1)   | 92.8(2)   |
| Cu(3)-O(2)-Cu(2)     | 109.3(2)   | O(2)-Cu(2)-Cl(1)     | 76.7(2)   |
| C(17)-N(7)-N(9)      | 107.7(6)   | Cl(4)-Cu(2)-Cl(1)    | 92.01(8)  |
| C(17)-N(7)-Cu(2)     | 132.2(6)   | O(1)-Cu(2)-Cl(1)     | 170.7(3)  |
| N(9)-N(7)-Cu(2)      | 120.0(5)   | N(9)-Cu(3)-N(3)      | 176.3(3)  |
| C(31)-N(9)-N(7)      | 107.2(7)   | N(9)-Cu(3)-O(2)      | 89.9(3)   |
| C(31)-N(9)-Cu(3)     | 133.1(6)   | N(3)-Cu(3)-O(2)      | 87.7(3)   |
|                      |            | N(7)-N(9)-Cu(3)      | 119.6(5)  |

Symmetry transformations used to generate equivalent atoms: 1)  $-x,y,z-1/2$ ; 2)  $-x,y,-z+3/2$ ; 3)  $x,-y,-z+3/2$ ; 4)  $x,-y,z-1/2$ ; 5)  $-x,-y,-z+1$ ; 6)  $x,y,-z+1$ .

Table S3. Selected Bond Lengths (Å) and Bond Angles (°) for **3**

|              |            |                  |            |
|--------------|------------|------------------|------------|
| Cu(1)-O(3)   | 1.937(3)   | O(3)-Cu(1)-O(5)  | 173.57(15) |
| Cu(1)-O(5)   | 1.942(3)   | O(3)-Cu(1)-O(8)  | 96.95(14)  |
| Cu(1)-O(8)   | 1.976(4)   | O(5)-Cu(1)-O(8)  | 84.65(14)  |
| Cu(1)-N(6)   | 1.990(4)   | O(3)-Cu(1)-N(6)  | 88.32(16)  |
| Cu(1)-Cl(6)  | 2.5637(13) | O(5)-Cu(1)-N(6)  | 88.73(15)  |
| Cu(1)-Cu(3)  | 2.8509(8)  | O(8)-Cu(1)-N(6)  | 165.87(15) |
| Cu(3)-O(1)   | 1.914(3)   | O(3)-Cu(1)-Cl(6) | 93.45(11)  |
| Cu(3)-O(5)   | 1.919(4)   | O(5)-Cu(1)-Cl(6) | 92.31(10)  |
| Cu(3)-O(8)   | 1.993(3)   | O(8)-Cu(1)-Cl(6) | 101.63(10) |
| Cu(3)-N(1)   | 2.001(4)   | N(6)-Cu(1)-Cl(6) | 91.08(12)  |
| Cu(6)-O(5)#1 | 1.908(3)   | O(3)-Cu(1)-Cu(3) | 137.56(11) |

|                      |            |                     |            |
|----------------------|------------|---------------------|------------|
| Cu(6)-O(8)           | 1.945(3)   | O(5)-Cu(1)-Cu(3)    | 42.08(11)  |
| Cu(6)-O(2)           | 1.969(3)   | O(8)-Cu(1)-Cu(3)    | 44.33(10)  |
| Cu(6)-O(4)           | 1.995(4)   | N(6)-Cu(1)-Cu(3)    | 125.51(11) |
| Cu(6)-Cl(6)#1        | 2.7502(13) | Cl(6)-Cu(1)-Cu(3)   | 108.82(4)  |
| Cu(8)-O(5)#2         | 1.927(3)   | O(1)-Cu(3)-O(5)     | 172.71(15) |
| Cu(8)-N(21)          | 1.989(4)   | O(1)-Cu(3)-O(8)     | 94.01(15)  |
| Cu(8)-N(9)           | 2.005(4)   | O(5)-Cu(3)-O(8)     | 84.80(13)  |
| Cu(8)-Cl(1)          | 2.2458(13) | O(1)-Cu(3)-N(1)     | 93.25(16)  |
| Cl(6)-Cu(6)#3        | 2.7502(13) | O(5)-Cu(3)-N(1)     | 89.12(15)  |
| O(8)-Cu(6)-O(2)      | 94.48(14)  | O(8)-Cu(3)-N(1)     | 168.30(16) |
| O(5)#1-Cu(6)-O(4)    | 89.21(15)  | O(1)-Cu(3)-Cu(1)    | 137.46(11) |
| O(8)-Cu(6)-O(4)      | 94.24(14)  | O(5)-Cu(3)-Cu(1)    | 42.71(9)   |
| O(2)-Cu(6)-O(4)      | 143.40(15) | O(8)-Cu(3)-Cu(1)    | 43.86(10)  |
| O(5)#1-Cu(6)-Cl(6)#1 | 87.49(10)  | N(1)-Cu(3)-Cu(1)    | 127.35(12) |
| O(8)-Cu(6)-Cl(6)#1   | 80.99(10)  | O(5)#1-Cu(6)-O(8)   | 168.38(14) |
| O(2)-Cu(6)-Cl(6)#1   | 116.27(11) | O(5)#1-Cu(6)-O(2)   | 89.28(14)  |
| O(4)-Cu(6)-Cl(6)#1   | 100.19(11) | O(5)#2-Cu(8)-Cl(1)  | 178.18(12) |
| O(5)#2-Cu(8)-N(21)   | 86.79(15)  | N(21)-Cu(8)-Cl(1)   | 92.01(12)  |
| O(5)#2-Cu(8)-N(9)    | 89.86(16)  | N(9)-Cu(8)-Cl(1)    | 91.38(12)  |
| N(21)-Cu(8)-N(9)     | 176.28(17) | Cu(1)-Cl(6)-Cu(6)#3 | 71.83(3)   |
| C(34)-O(2)-Cu(6)     | 126.5(3)   |                     |            |

Symmetry transformations used to generate equivalent atoms: 1)  $x, -y-1, z-1/2$ ; 2)  $x-1/2, y+1/2, z$ ; 3)  $x, -y-1, z+1/2$ .

## References.

(1) Yang, R. T. Gas Separation by Adsorption Processes, Butterworth, Boston, 1997.
